# Supplementary material for: The Gut Microbiota Communities of Wild Arboreal and Ground-Feeding Tropical Primates Are Affected Differently by Habitat Disturbance
Source: PubMed Central journal article supplement (PMC7253362; doi:10.1128/msystems.00061-20), 2020-05-26

SV

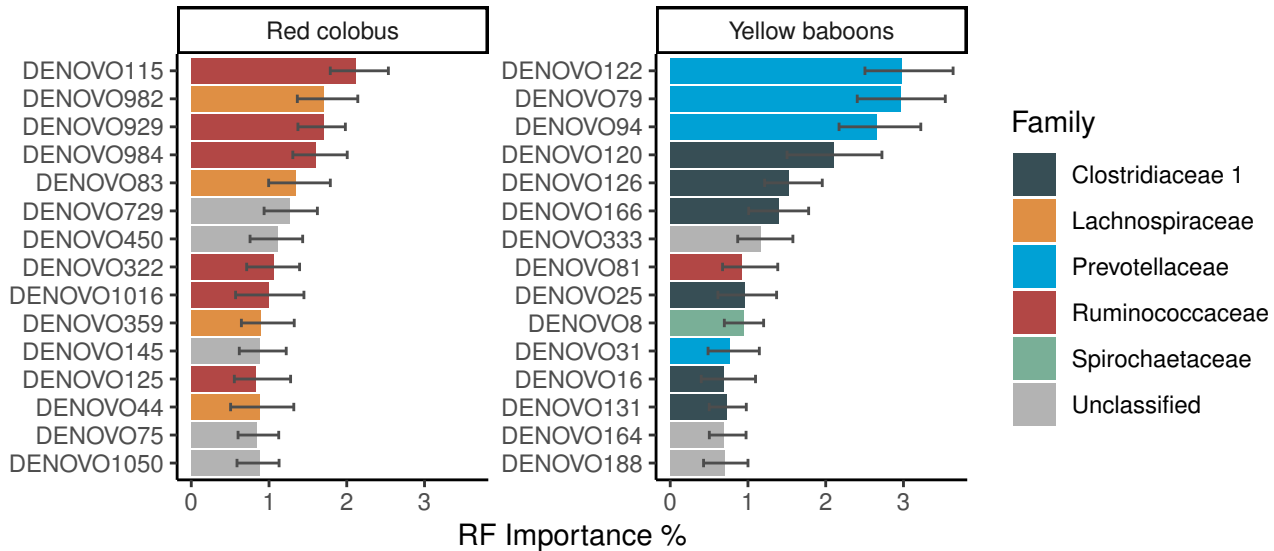

Supplement: mSystems.00061-20-sf004.pdf [file mSystems.00061-20-sf004.pdf]
